# Supplementary material
Source: publisher site journal article supplement (http://kjim.org/upload/media/kjim-2016-296-suppl2.pdf)
Supplement: Supplementary file 1 [file kjim-2016-296-suppl2.pdf]

**Supplementary Table 2. Factors associated with serum sodium using multivariable linear regression stratified by nephrology referral**

| Variable                                       | $\beta$ | Standardized $\beta$ | 95% CI           | p value |
|------------------------------------------------|---------|----------------------|------------------|---------|
| <b>Early referral</b>                          |         |                      |                  |         |
| Age                                            | -0.110  | -0.118               | -0.205 to -0.015 | 0.023   |
| Malignancy                                     | -1.266  | -0.104               | -2.463 to -0.069 | 0.038   |
| eGFR <sup>a</sup> , mL/min/1.73 m <sup>2</sup> | 0.158   | 0.139                | 0.036 to 0.279   | 0.011   |
| CVC/AVF + AVG                                  | -2.234  | -0.223               | -3.244 to -1.223 | < 0.001 |
| Albumin, g/dL                                  | 0.903   | 0.107                | 0.053 to 1.753   | 0.037   |
| Phosphorus, mg/dL                              | -0.349  | -0.109               | -0.688 to -0.009 | 0.044   |
| <b>Late referral</b>                           |         |                      |                  |         |
| CVC/AVF + AVG                                  | -2.633  | -0.148               | -5.001 to -0.265 | 0.029   |
| CCI                                            | -0.415  | -0.155               | -0.816 to -0.015 | 0.042   |
| Phosphorus, mg/dL                              | -0.459  | -0.151               | -0.863 to -0.055 | 0.026   |

Multivariable: age, gender, hypertension, diabetes mellitus, congestive heart failure, malignancy, liver cirrhosis, charlson comorbidity index, eGFR, vascular access, nephrology referral, white blood cell, phosphorus, and albumin.

CI, confidence interval; eGFR, estimated glomerular filtration rate; CVC, central venous catheter; AVF, arteriovenous fistula; AVG, arteriovenous graft; CCI, Charlson comorbidity index.

<sup>a</sup>eGFR was calculated using the Modification of Diet in Renal Disease study equation.
